# Supplementary material for: The flavonoid procyanidin C1 has senotherapeutic activity and increases lifespan in mice
Source: PubMed Central journal article supplement (PMC8688144; doi:10.1038/s42255-021-00491-8), 2021-12-06

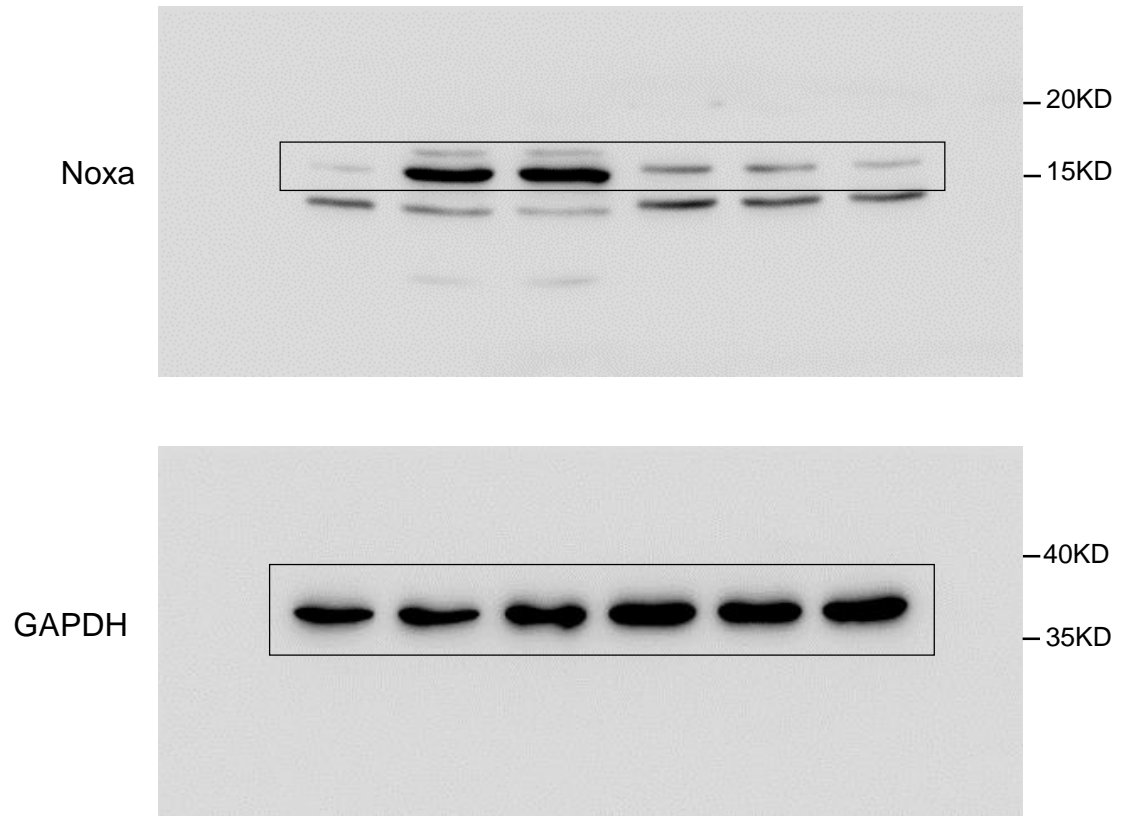

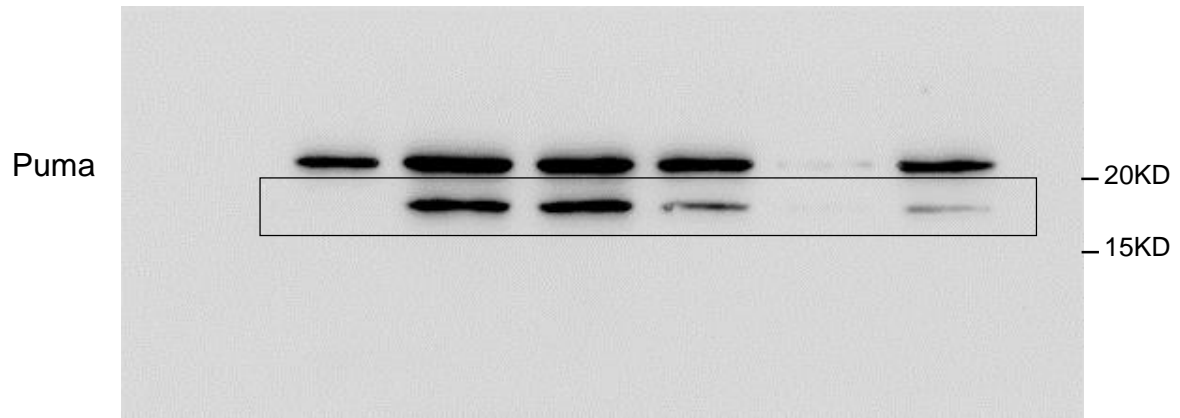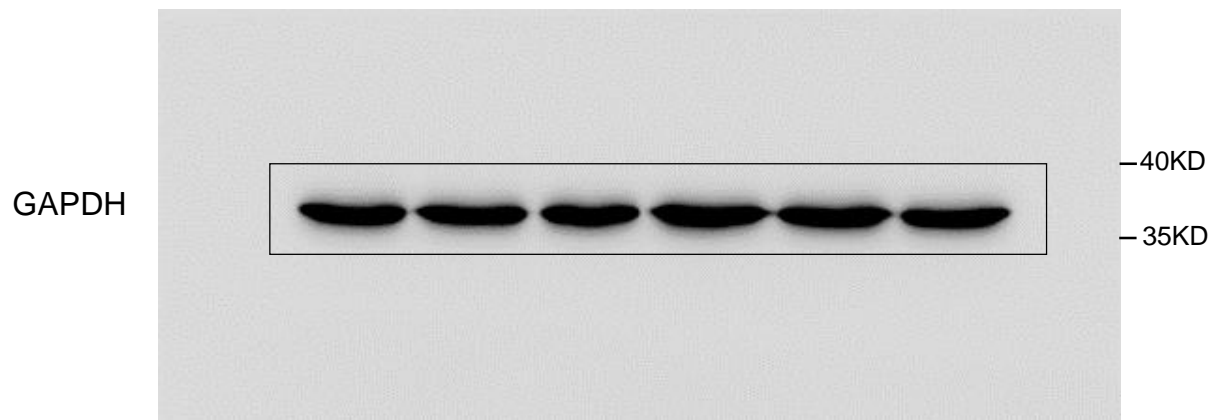

Cytochrome c

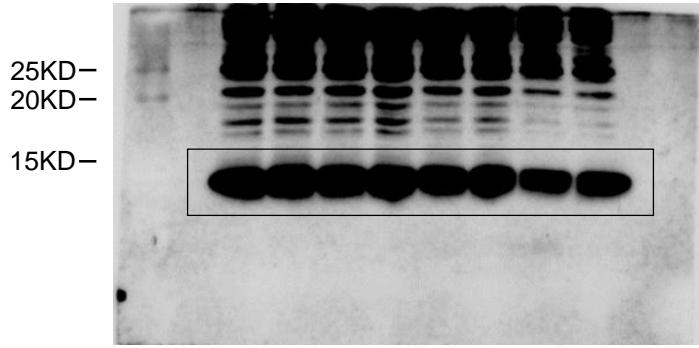

Mitochondria

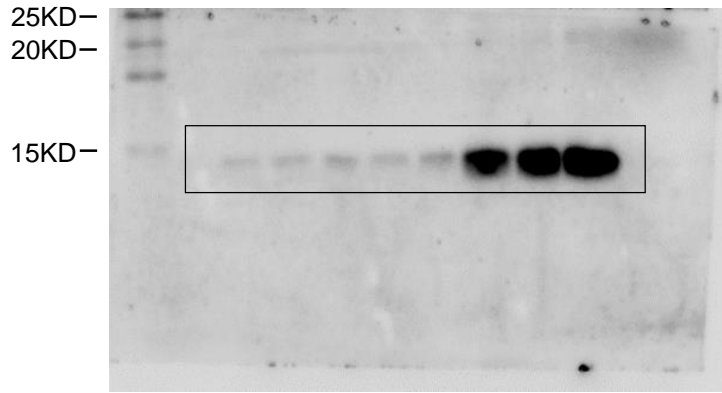

Cytoplasm

GAPDH

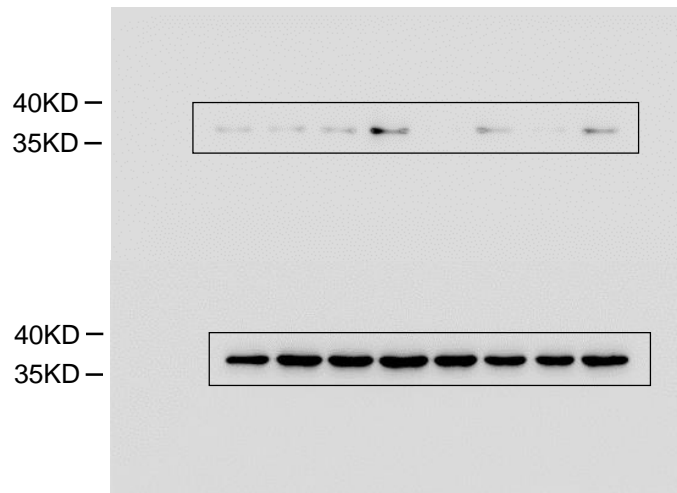

Mitochondria

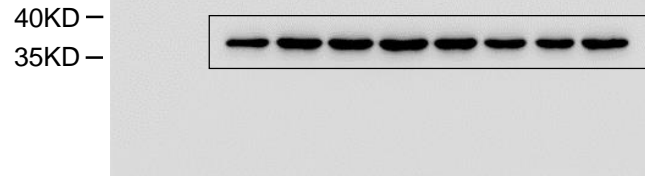

Cytoplasm

COX IV

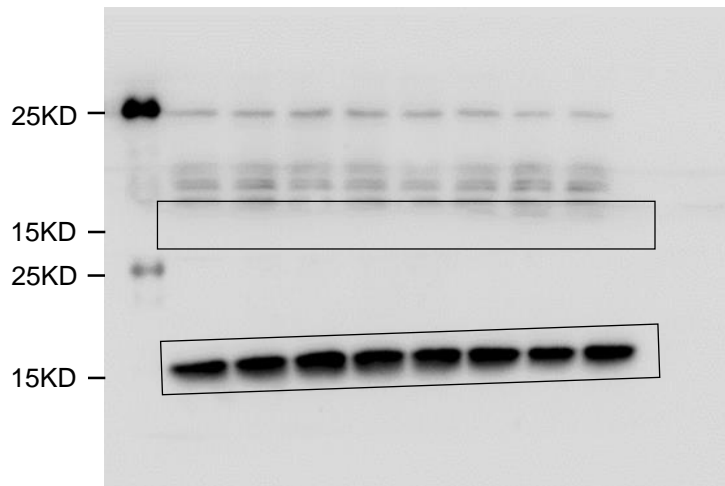

Mitochondria

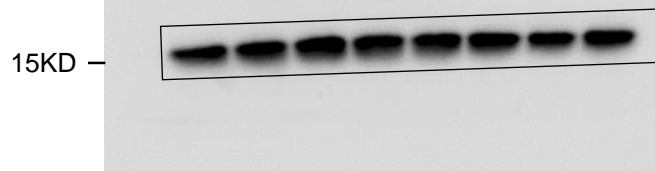

Cytoplasm

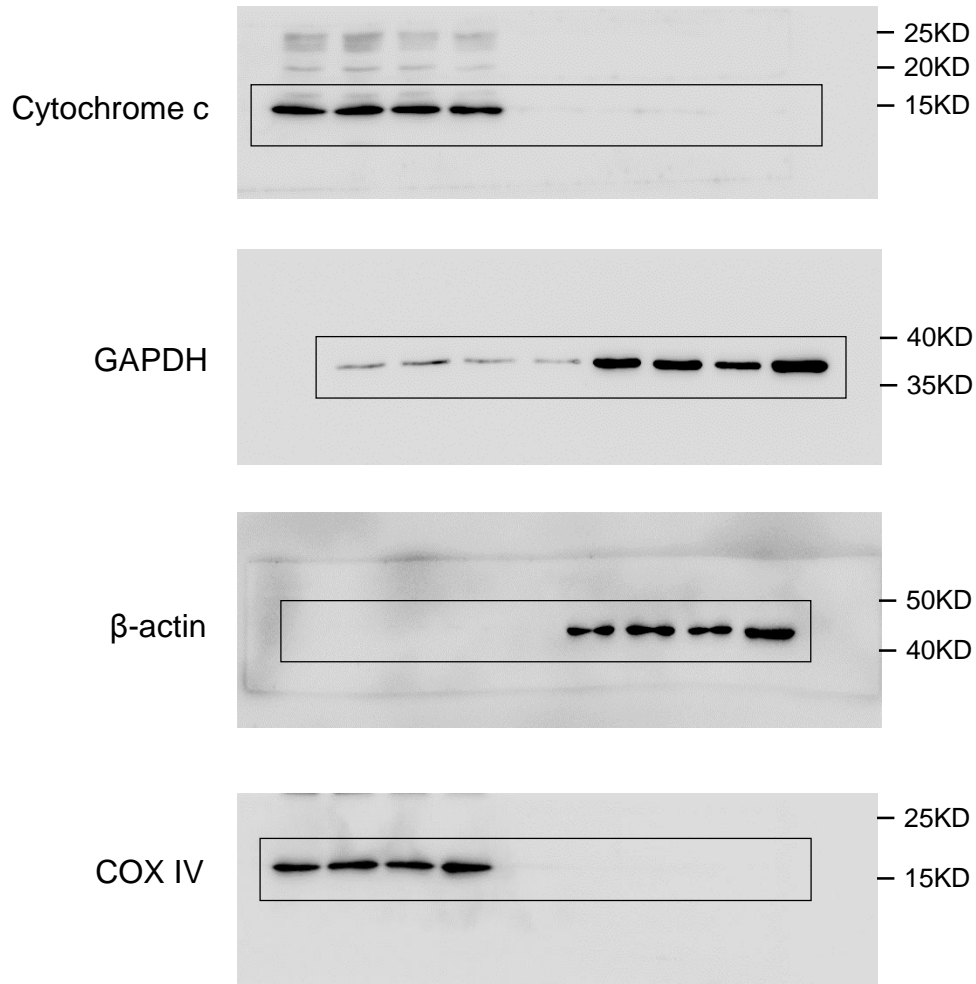

Supplement: 42255_2021_491_MOESM18_ESM.pdf [file 42255_2021_491_MOESM18_ESM.pdf]
